# Supplementary material for: Biological Effects of “Inflammageing” on Human Oral Cells: Insights into a Potential Confounder of Age-Related Diseases
Source: MDPI journal article supplement (doi:10.3390/ijms25010005), 2023-12-19
Supplement: s1 [file s1]

G1

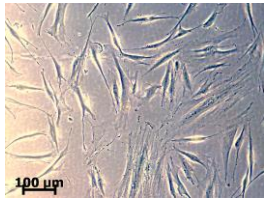

CONTROL

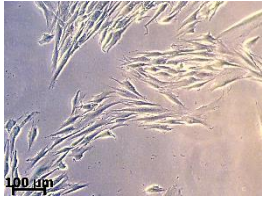

TNFa-1

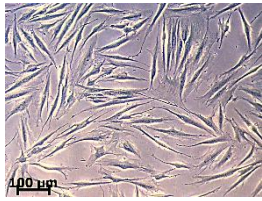

TNFa-2

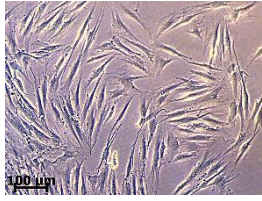

LPS-1

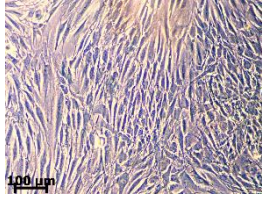

LPS-2

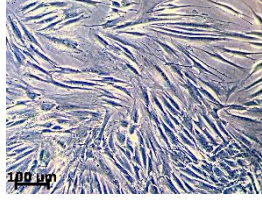

GCF-1

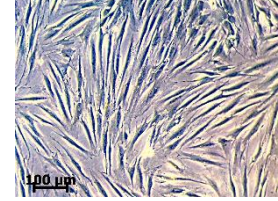

GCF-2

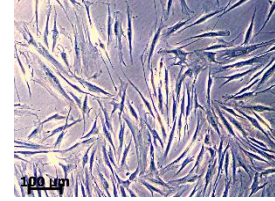

EtOH-1

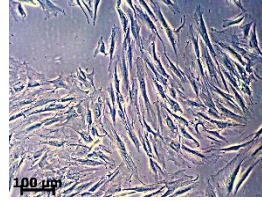

EtOH-2

G2

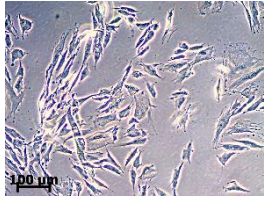

Early passage  
CONTROL

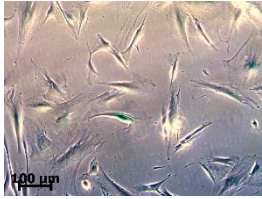

Middle passage  
CONTROL

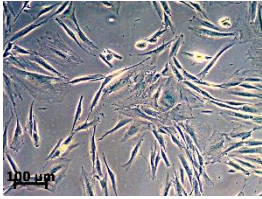

Middle passage TNFa

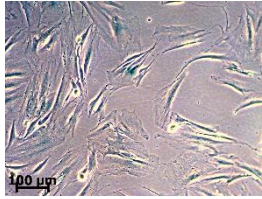

Middle passage LPS

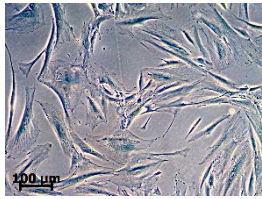

Middle passage GCF

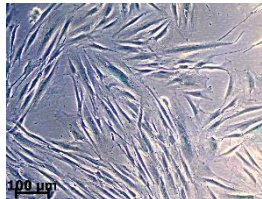

Late passage  
CONTROL

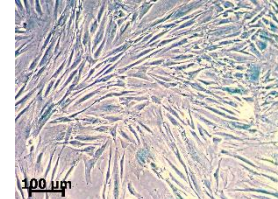

Late passage TNFa

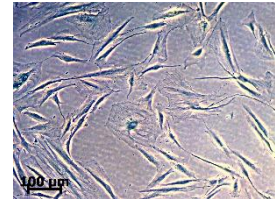

Late passage LPS

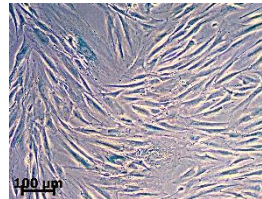

Late passage GCF

**Supplementary Figure S1:** Impact of long-term and short-term exposure of HGFs to several pro-inflammatory signals (TNFa, LPS, GCF) on  $\beta$ -galactosidase activity. Optical microscopy photographs of HGFs, exposed short-term and long-term to pro-inflammatory signals (scale bars: 100  $\mu$ m).

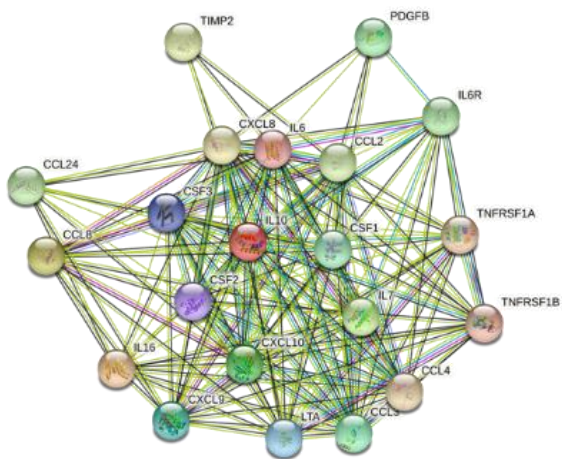

(a)

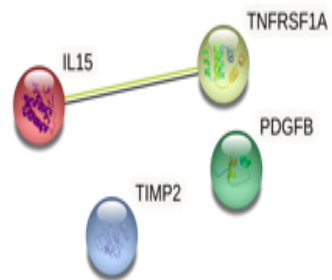

(b)

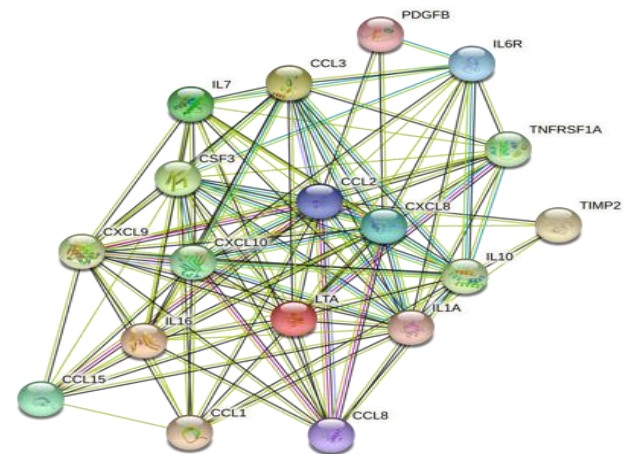

(c)

**Supplementary Figure S2 :** Interaction network of the statistically significant proteins (adj.  $p$ -value  $\leq 0.05$ ) for a) GCF, b) LPS, and c) TNFa. The line color indicates the type of interaction evidence.
